# Supplementary material
Source: MDPI journal article supplement (https://www.mdpi.com/2311-5637/9/9/839)
Supplement: s1 [file s1]

## Supplementary Materials for "Prospective Life Cycle Assessment of Microbial Sophorolipid Fermentation"

Table S 1. Inventory data for winter rapeseed production and rapeseed oil production adapted from study of Fridrihsone in 2020 [24]

| Data                                                                           | Unit | Value    |
|--------------------------------------------------------------------------------|------|----------|
| <b>RAPESEED PRODUCTION (1 ton)</b>                                             |      |          |
| <b>INPUT</b>                                                                   |      |          |
| Occupation, agriculture                                                        | ha a | 3.5      |
| <b>Materials/fuels</b>                                                         |      |          |
| Rape seed, for sowing {RoW}  market for rape seed, for sowing   Cut-off, S     | kg   | 1.4      |
| off, S                                                                         | kg   | 17.4     |
| Potassium chloride {RoW}  market for potassium chloride   Cut-off, S           | kg   | 36.9     |
| Ammonium sulfate {RoW}  market for ammonium sulfate   Cut-off, S               | kg   | 4.3      |
| Ammonium nitrate {RoW}  market for ammonium nitrate   Cut-off, S               | kg   | 29.5     |
| Ammonium sulfate {RoW}  market for ammonium sulfate   Cut-off, S               | kg   | 10.8     |
| Cut-off, S                                                                     | kg   | 14.5     |
| Acetamide-anillide-compound, unspecified {RoW}  production   Cut-off, S        | kg   | 0.24     |
| Diphenylether-compound {RoW}  production   Cut-off, S                          | kg   | 0.029    |
| Cyclic N-compound {RoW}  production   Cut-off, S                               | kg   | 0.032    |
| Diesel {Europe without Switzerland}  market for   Cut-off, S                   | kg   | 14.5     |
| transport, freight, lorry 7.5-16 metric ton, EURO4   Cut-off, S                | tkm  | 0.1      |
| freight, lorry 16-32 metric ton, EURO4   Cut-off, S                            | tkm  | 146.7    |
| transport, freight, lorry 3.5-7.5 metric ton, EURO4   Cut-off, S               | tkm  | 0.1      |
| Cut-off, S                                                                     | tkm  | 1.1      |
| tractor and trailer, agricultural   Cut-off, S                                 | tkm  | 4.8      |
| <b>Electricity/heat</b>                                                        |      |          |
| Heat, district or industrial, natural gas {RER}  market group for   Cut-off, S | MJ   | 189.2    |
| Rape seeds (winter)                                                            | ton  | 1        |
| <b>Emissions to air</b>                                                        |      |          |
| Nitrogen oxides, LV                                                            | kg   | 1.73     |
| Metazachlor                                                                    | kg   | 0.012    |
| Quinmerac                                                                      | kg   | 0.00059  |
| Epoxiconazole                                                                  | kg   | 0.00018  |
| Lambda-cyhalothrin                                                             | kg   | 0.000029 |
| Cyproconazole                                                                  | kg   | 0.00069  |
| Azoxystrobin                                                                   | kg   | 0.00034  |
| Deltamethrin                                                                   | kg   | 0.000014 |
| Propaquizafop                                                                  | kg   | 0.00029  |
| Diquat dibromide                                                               | kg   | 0        |
| Carbon dioxide, fossil                                                         | kg   | 7.97     |
| Ammonia, LV                                                                    | kg   | 2.69     |
| Water                                                                          | kg   | 45.45    |
| <b>Emissions to water</b>                                                      |      |          |
| Phosphorous acid                                                               | kg   | 0.04     |
| Nitrate                                                                        | kg   | 83.97    |

|                    |    |           |
|--------------------|----|-----------|
| Metazachlor        | kg | 0.0012    |
| Quinmerac          | kg | 0.0003    |
| Epoxiconazole      | kg | 0.00009   |
| Lambda-cyhalothrin | kg | 0.000014  |
| Cyproconazole      | kg | 0.000069  |
| Azoxystrobin       | kg | 0.00017   |
| Deltamethrin       | kg | 0.0000071 |
| Propaquizafop      | kg | 0.00014   |
| Diquat dibromide   | kg | 0         |

#### **Emissions to soil**

|                    |    |         |
|--------------------|----|---------|
| Metazachlor        | kg | 0.012   |
| Quinmerac          | kg | 0.03    |
| Metconazole        | kg | 0.009   |
| Lambda-cyhalothrin | kg | 0.0014  |
| Cyproconazole      | kg | 0.0069  |
| Azoxystrobin       | kg | 0.017   |
| Deltamethrin       | kg | 0.00071 |
| Propaquizafop      | kg | 0.014   |
| Diquat dibromide   | kg | 0       |

#### **RAPESEED OIL PRODUCTION (1 ton)**

##### **INPUT**

|                                                                             |     |      |
|-----------------------------------------------------------------------------|-----|------|
| Rape seeds                                                                  | kg  | 2778 |
| Electricity, medium voltage {LV}  market for   Cut-off, S                   | kWh | 125  |
| Electricity, medium voltage {LV}  market for   Cut-off, S                   | kWh | 0.65 |
| Transport, tractor and trailer, agricultural {RoW}  processing   Cut-off, S | tkm | 97.2 |

##### **OUTPUT**

|               |    |      |
|---------------|----|------|
| Rapeseed oil  | kg | 1000 |
| Rapeseed cake | kg | 1722 |
| Loss          | kg | 56   |
